# Supplementary material for: Chemical Composition and Enzymatic Screening of Micromeria fruticosa serpyllifolia Volatile Oils Collected from Three Different Regions of West Bank, Palestine
Source: Hindawi journal article supplement (doi:10.1155/2018/6536919), 2018-10-16
Supplement: f1 [file 6536919.f1.pdf]

571 **Supplementary data**

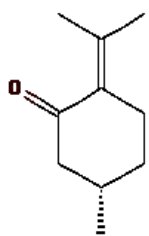

Pulegone [51]

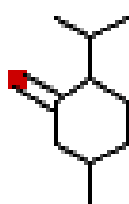

Isomenthone [52]

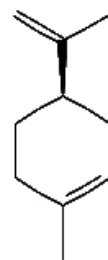

D-Limonene [53]

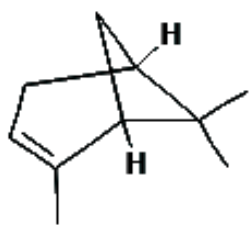

Alpha-Pinene [54]

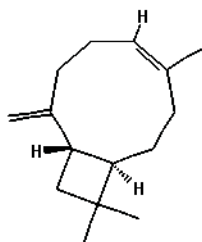

Isocaryophyllene [55]

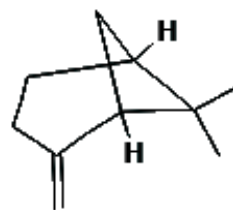

Beta-Pinene [56]

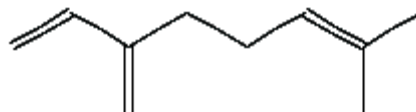

$\beta$ -Myrcene [57]

572 **Chemical structures of the main components of *M. fruticosa serpyllifolia* VOs**

573

574

\*\*\* CLASS-5000 \*\*\* Report No. = 1 Data : ESS.D90 117/07/2 413:51:1  
 Sample : Nablus-Micro Fru  
 ID : 24/07/2017  
 Sample Amount : 1  
 Dilution Factor : 1  
 Type : Unknown  
 Operator : Shadi K  
 Method File Name : ESSOIL.MET  
 Vial No. : 1  
 Barcode :

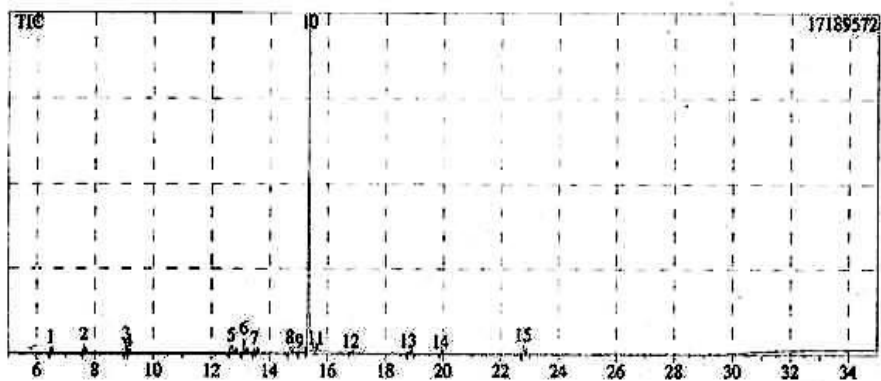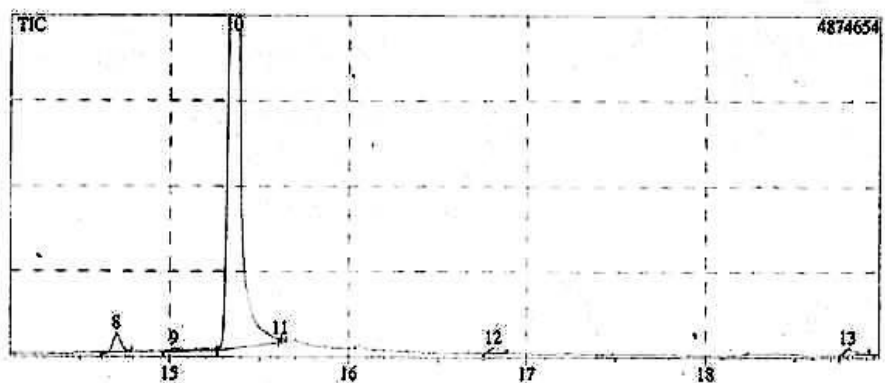

Scan # : 1243  
 Mass Peak # : 88 Ret. Time : 15.350  
 Base Peak : 81.05 ( 1925660)

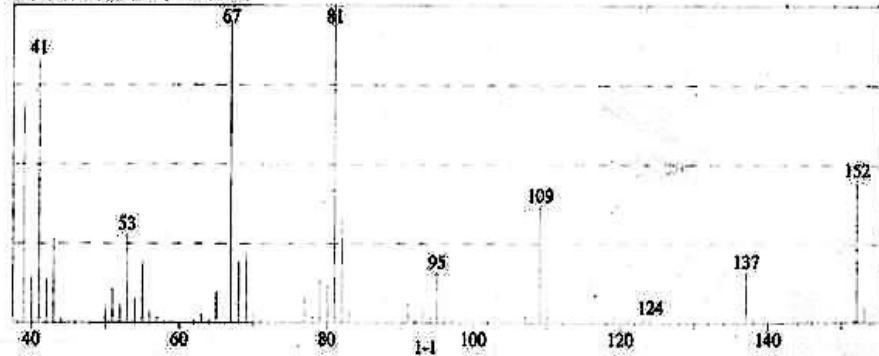

\*\*\* CLASS-5000 \*\*\* Report No. = 1 Data : ESS.D89 117/07/2 413.01:1  
Sample : Ramallah-Micro Fru  
ID : 24/07/2017  
Sample Amount : 1  
Dilution Factor : 1  
Type : Unknown  
Operator : Shadi K.  
Method File Name : ESSOIL.MET  
Vial No. : 1  
Barcode :

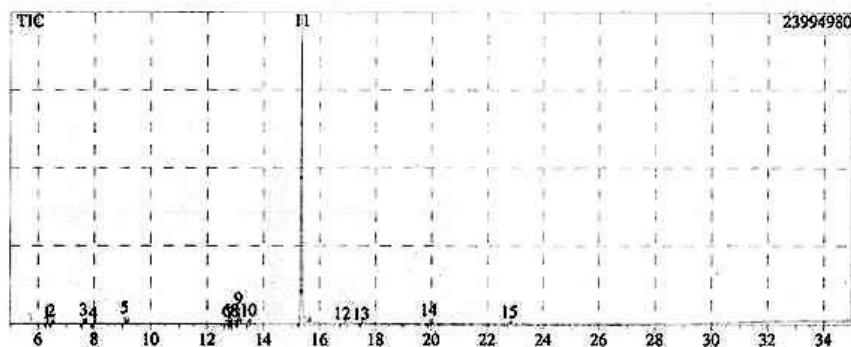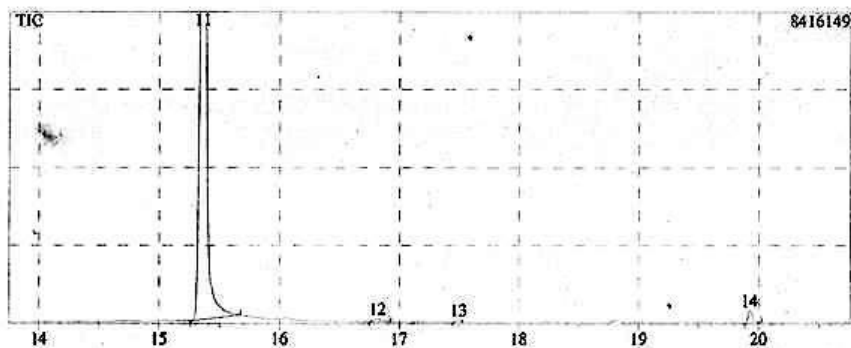

Scan # : 1244  
Mass Peak # : 85 Ret. Time : 15.358  
Base Peak : 81.05 ( 2839900)

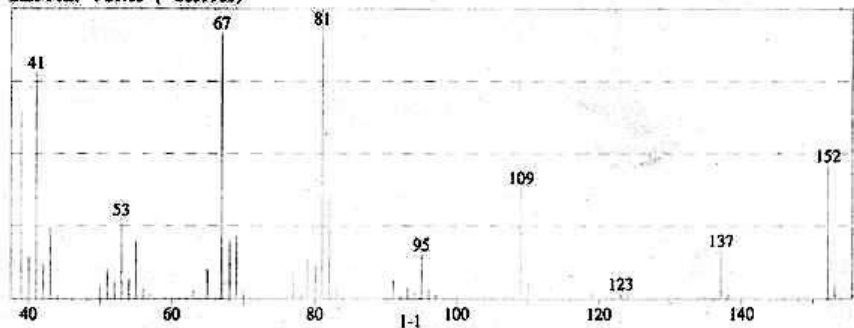

581

### Supplementary 4

\*\*\* CLASS-5000 \*\*\* Report No. = 1 Data : ESS.D91 117/07/2 414:47:0  
Sample : Hebron-Micro Fru  
ID : 24/07/2017  
Sample Amount : 1  
Dilution Factor : 1  
Type : Unknown  
Operator : Shadi K  
Method File Name : ESSOIL.MET  
Vial No. : 1  
Barcode :

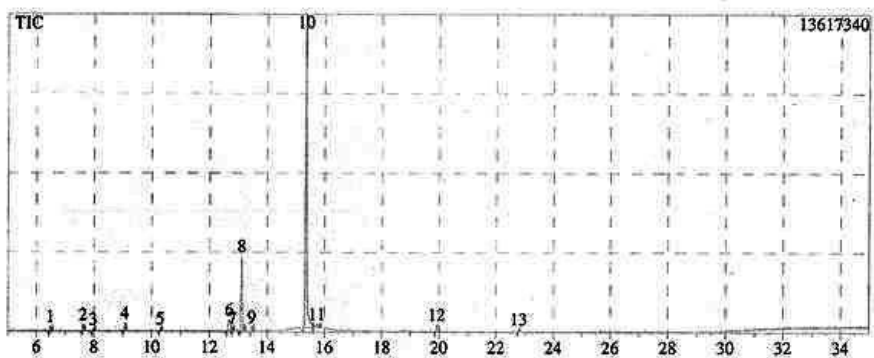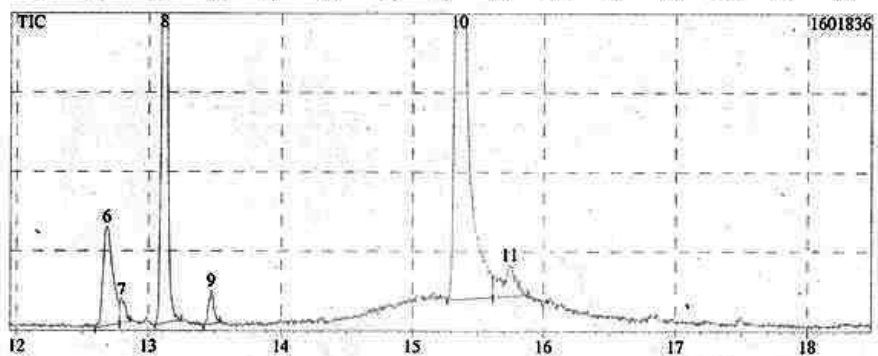

Scan # : 1244  
Mass Peak # : 86 Ret. Time : 15.358  
Base Peak : 81.05 ( 1700047)

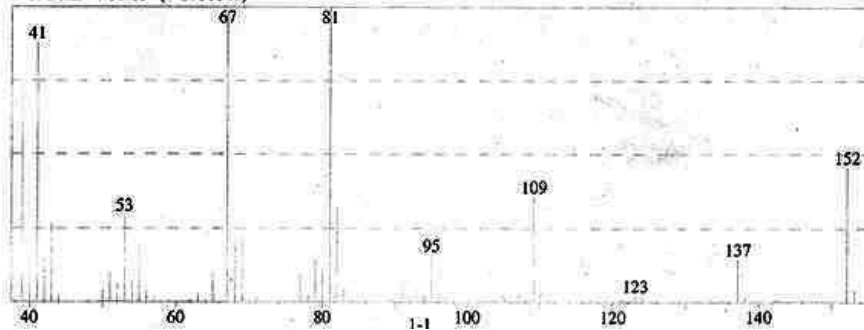

582

583

Chromatogram of *M fruticosa serpyllifolia* VO of Hebron
